# Supplementary material
Source: PubMed Central journal article supplement (PMC5098805)

# Flow Chart for Randomized Analysis

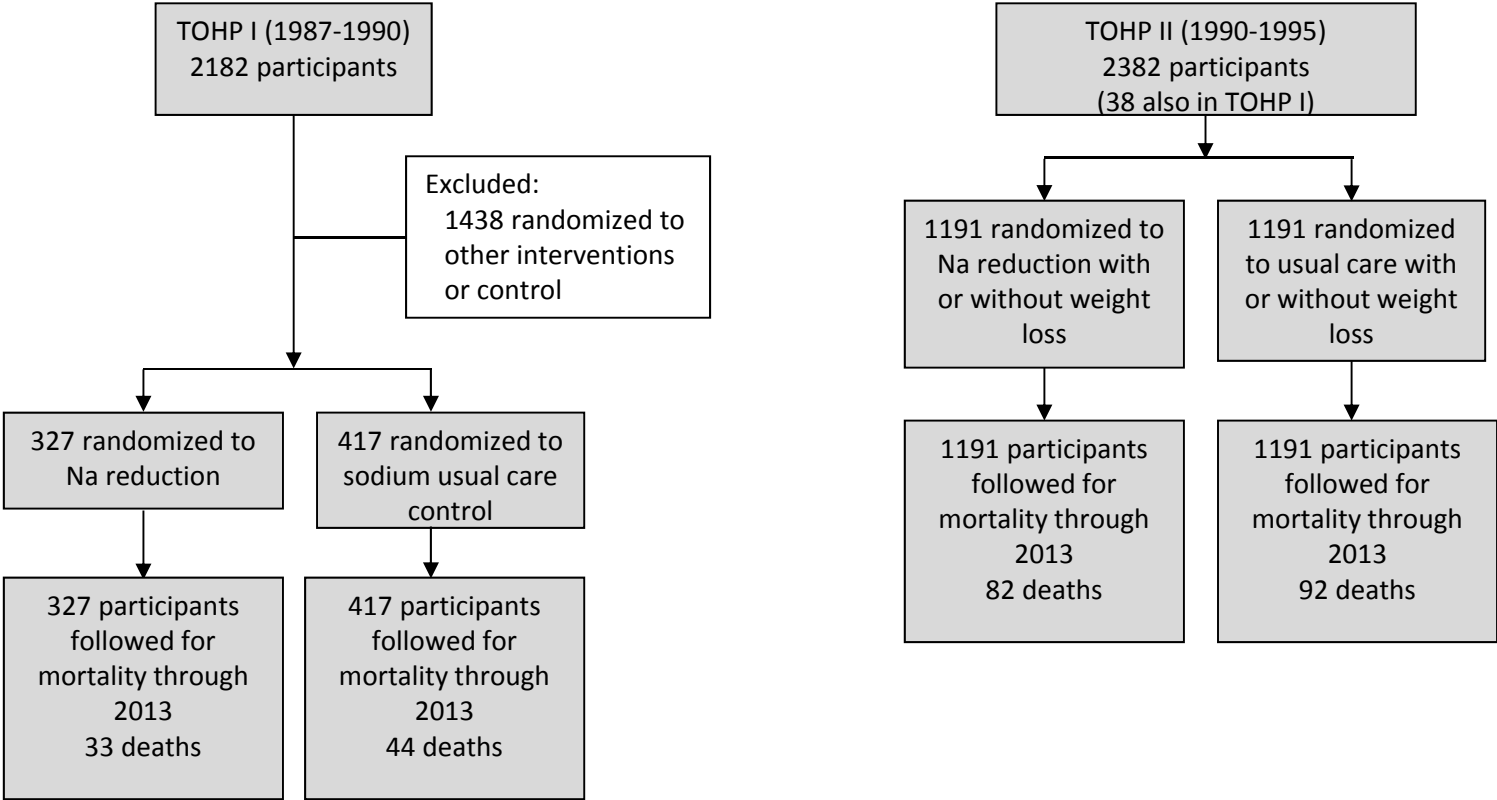

# Flow Chart for Observational Analysis

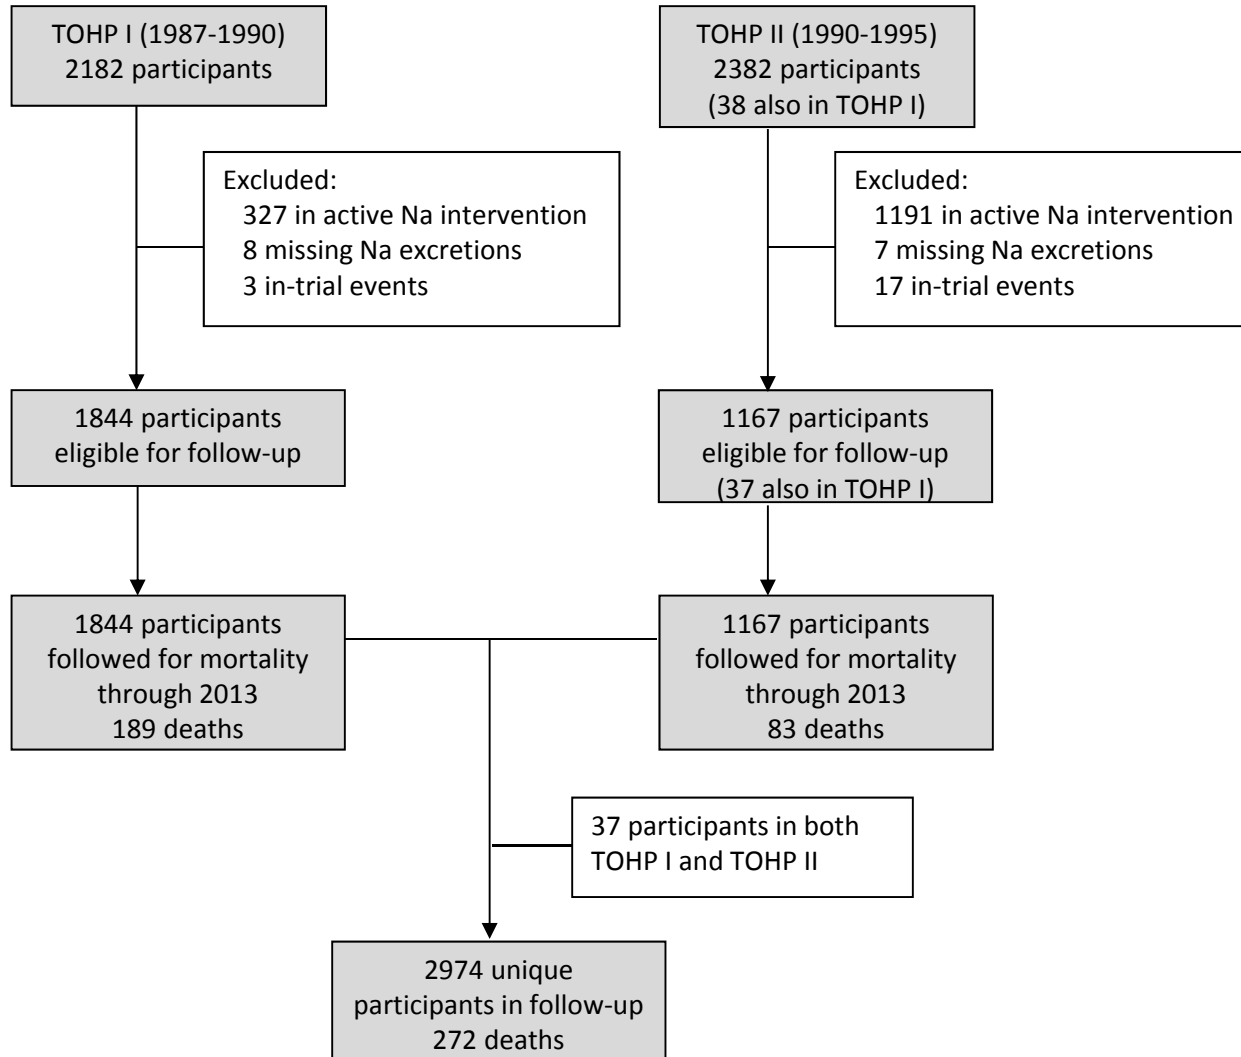

# Cumulative HRs over Time

For Sodium Reduction vs Usual Care in TOHP I and II

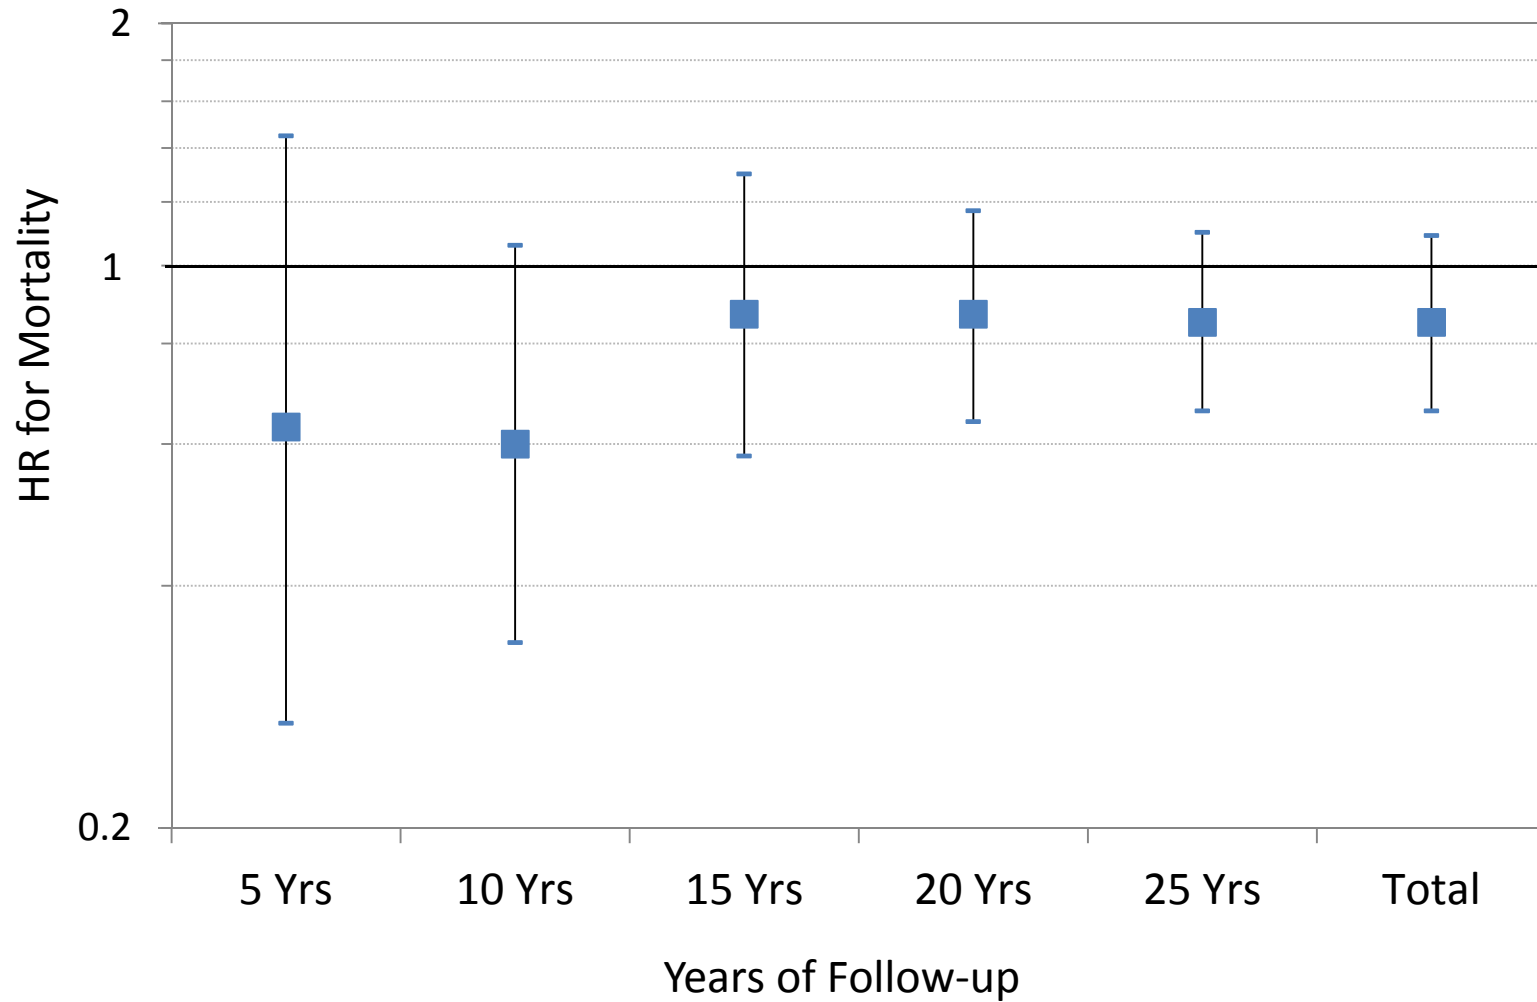

Spline Plot of Sodium/Potassium Ratio and Total Mortality

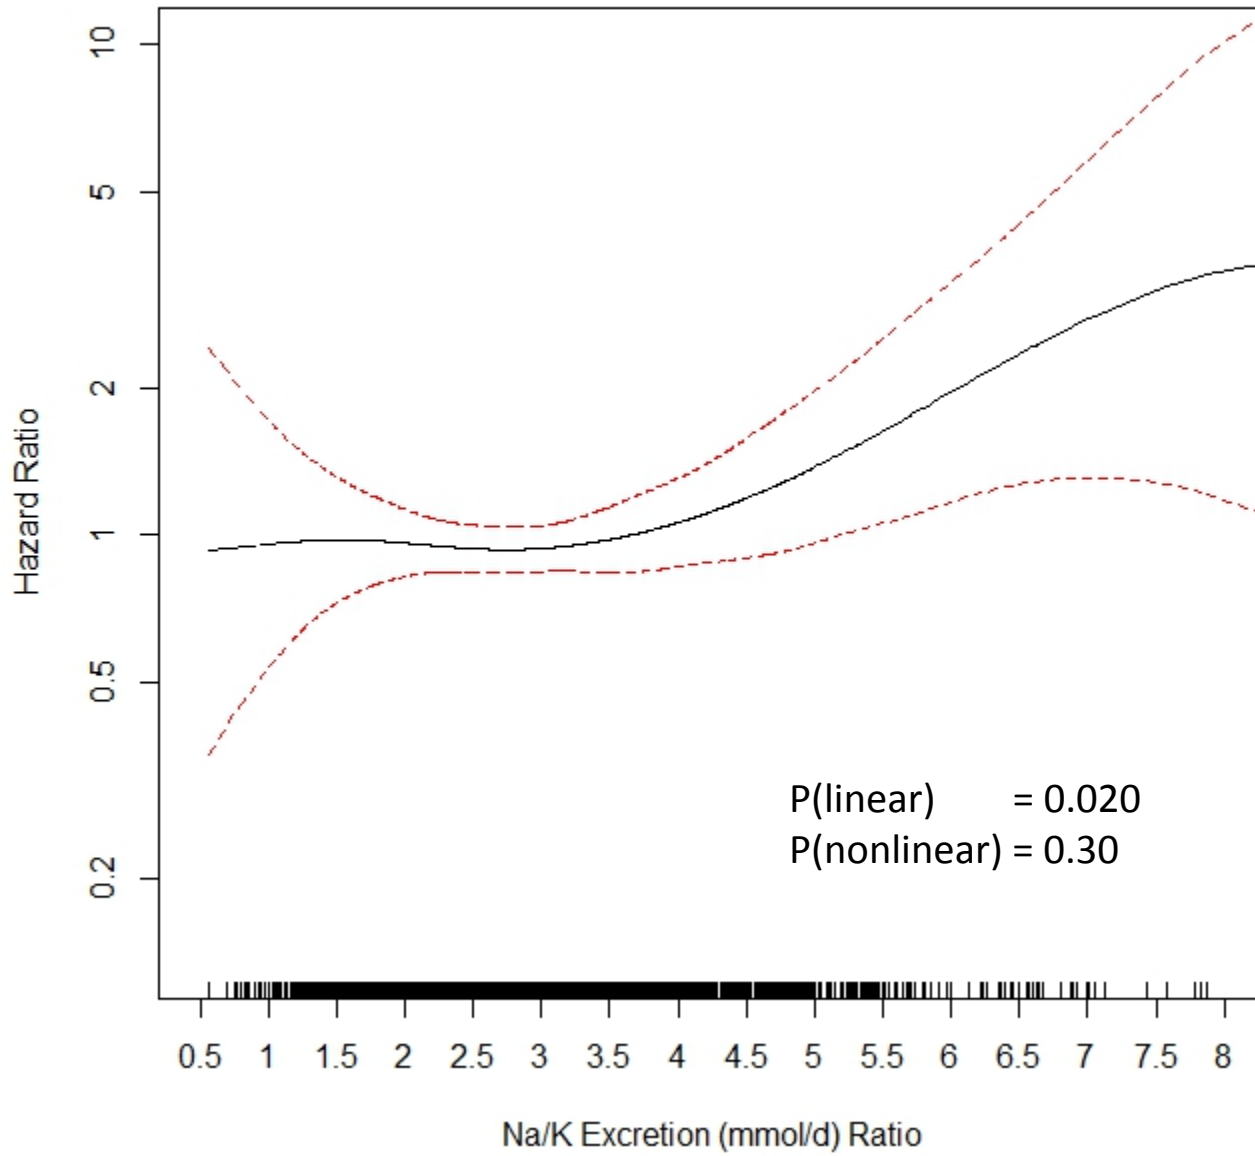

Supplement: NIHMS806065-supplement-Suppl_figures.pdf [file NIHMS806065-supplement-Suppl_figures.pdf]
